# Supplementary material for: Surprise response as a probe for compressed memory states
Source: PubMed Central journal article supplement (PMC7018098; doi:10.1371/journal.pcbi.1007065), 2020-02-03
Supplement: pcbi.1007065.s009.pdf [file pcbi.1007065.s009.pdf]

**S1 Table**

| <i>SubjectNo.</i> | <b>N (NOC model)</b> | <b>N (IB model)</b> | <b><math>\beta</math> (IB model)</b> |
|-------------------|----------------------|---------------------|--------------------------------------|
| 1                 | 45                   | 42                  | 100                                  |
| 2                 | 11                   | 11                  | 48.33                                |
| 3                 | 9                    | 9                   | 48.33                                |
| 4                 | 41                   | 41                  | 14.38                                |
| 5                 | 19                   | 20                  | 2.64                                 |
| 6                 | 38                   | 38                  | 100                                  |
| 7                 | 2                    | 41                  | 61.58                                |
| 8                 | 12                   | 12                  | 100                                  |
| 9                 | 19                   | 19                  | 2.64                                 |
| 10                | 42                   | 40                  | 2.64                                 |
| 11                | 15                   | 15                  | 100                                  |
| 12                | 42                   | 42                  | 2.64                                 |
| 13                | 27                   | 27                  | 4.28                                 |
| 14                | 15                   | 15                  | 2.64                                 |
| 15                | 43                   | 42                  | 100                                  |
| 16                | 18                   | 18                  | 48.33                                |
| 17                | 16                   | 16                  | 100                                  |

**Model fit parameters for the NOC and IB models.** The model parameters with the highest weighted- $R^2$  for each of the subjects are presented for the NOC and for the IB models. For the IB model the  $N, \beta$  parameters were extracted from the individual maps shown in fig. 4c and in a similar manner  $N$  was extracted for the NOC model, as described in more detail in the Methods section.
